# Supplementary material for: Propolis Ethanolic Extract Attenuates D-gal-induced C2C12 Cell Injury by Modulating Nrf2/HO-1 and p38/p53 Signaling Pathways
Source: MDPI journal article supplement (doi:10.3390/ijms24076408), 2023-03-29
Supplement: s1 [file s1]

**Table S1 Composition of Chinese Propolis (CP) Ethanol Extract<sup>1</sup>**

| Compound number | Compound name              | RT (min) | Content in CP (mg/g raw propolis) |
|-----------------|----------------------------|----------|-----------------------------------|
| 1               | Protocatechuic acid        | 30.98    | 29.48                             |
| 2               | Luteolin                   | 26.33    | 4.03                              |
| 3               | Apigenin                   | 31.42    | 3.87                              |
| 4               | Chrysin                    | 30.70    | 3.57                              |
| 5               | 3,4-Dimethoxycinnamic acid | 21.05    | 3.15                              |
| 6               | trans-Isoferulic acid      | 16.79    | 3.10                              |
| 7               | (Pinocembrin)              | 29.87    | 2.69                              |
| 8               | 3-O-acetylpinobanksin      | 30.19    | 2.11                              |
| 9               | Caffeic acid               | 7.41     | 2.10                              |
| 10              | p-Coumaric acid            | 12.15    | 1.85                              |
| 11              | Pinobanksin                | 25.64    | 1.71                              |
| 12              | Ferulic acid               | 14.65    | 1.65                              |
| 13              | Galangin                   | 27.76    | 1.56                              |
| 14              | Gallic acid                | 22.88    | 0.67                              |
| 15              | Kaempferol                 | 27.40    | 0.63                              |
| 16              | Cinnamic acid              | 22.93    | 0.56                              |
| 17              | Quercetin                  | 25.54    | 0.30                              |
| 18              | Protocatechuic acid        | 3.05     | 0.25                              |
| 19              | Hesperitin                 | 26.40    | 0.06                              |
| 20              | Vanillic acid              | 6.24     | 0.02                              |

1. K. Wang, X. Jin, Q. Li, A. Sawaya, R. K. Le Leu, M. A. Conlon, L. Wu and F. Hu, Propolis from Different Geographic Origins Decreases Intestinal Inflammation and Bacteroides spp. Populations in a Model of DSS-Induced Colitis, *Mol. Nutr. Food Res.*, 2018, **62**, e1800080.

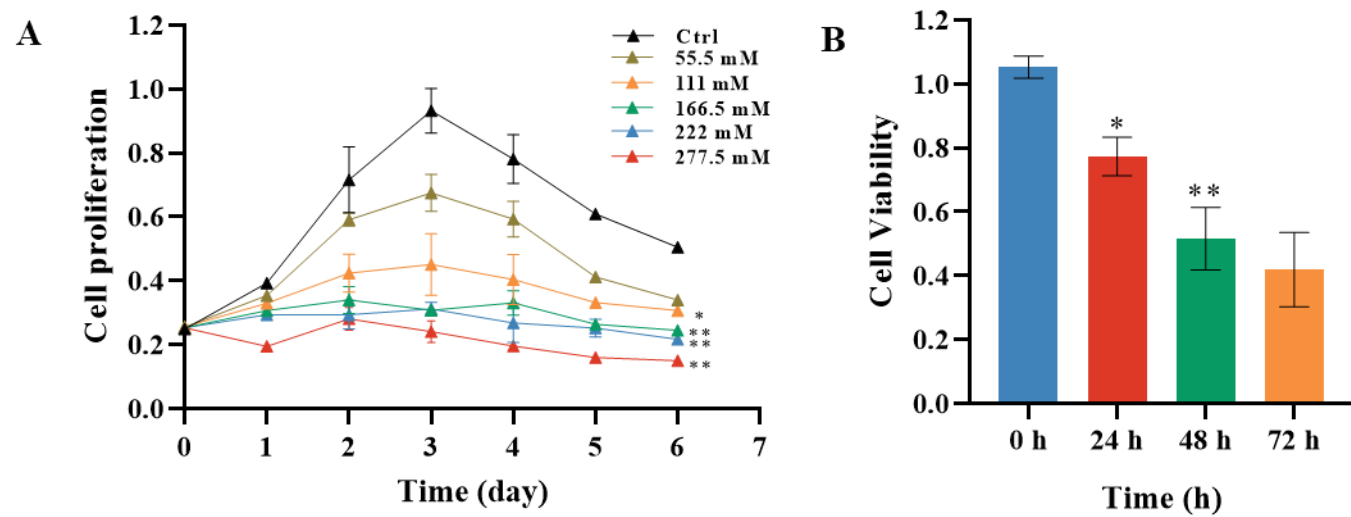

Fig. S1 Establishment of a D-gal-induced senescent cell model. (A) Effect of D-gal (55.5-277.5 mM) on the proliferation of C2C12 cells. (B) Effect of D-gal (111 mM) treatment on C2C12 cell viability at different time periods. All data are expressed as mean  $\pm$  SEM (n = 3). \*  $P < 0.05$  and \*\*  $P < 0.01$ .
